# Supplementary material for: Successive order–order transitions of the hierarchical morphology of a dendron-jacketed block copolymer via subsequent stretching alignment and self-assembly
Source: Royal Society of Chemistry journal article supplement (doi:10.1039/c2sm26331a), 2012-01-01
Supplement: c2sm26331a.pdf [file c2sm26331a.pdf]

## Supporting Information

### Successive Order-Order Transitions of the Hierarchical Morphology of a Dendron-jacketed Block Copolymer via Subsequent Stretching Alignment and Self-assembly

Wei-Tsung Chuang,\* Yen-Chih Huang, Chun-Jen Su, U-Ser Jeng,\* and Hwo-Shuenn Sheu  
National Synchrotron Radiation Research Center, 101 Hsin-Ann Road, Hsinchu 30076, Taiwan  
E-mail: weitsung@nsrrc.org.tw and usjeng@nsrrc.org.tw

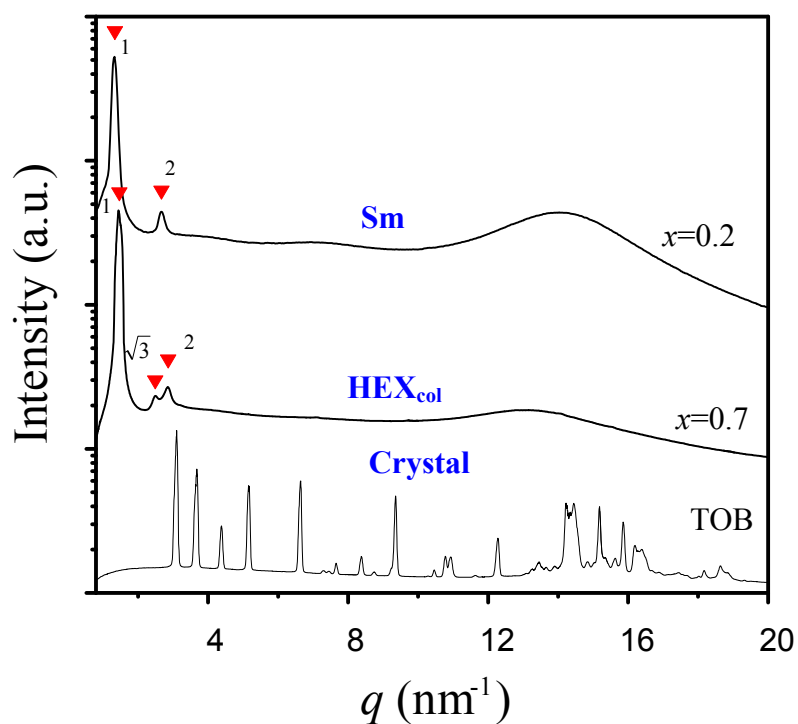

**Figure S1.** WAXS profiles of PS-*b*-P4VP(TOB)<sub>*x*</sub>. Note that with  $x = 0.7$  and  $0.2$ , there is no observable reflections from pure TOB crystals, indicating that TOB can disperse in the supramolecular complex well up to  $x = 0.7$ .

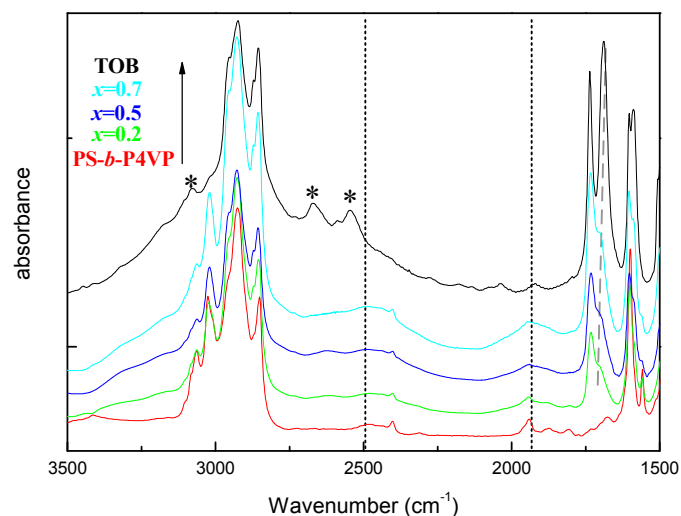

**Figure S2** FT-IR spectra for the TOB, PS-*b*-P4VP(TOB)<sub>x</sub>, and PS-*b*-P4VP, respectively.

The FT-IR spectra of the pure TOB, PS-*b*-P4VP and PS-*b*-P4VP(TOB)<sub>x</sub> are shown in Figure S2. For pure TOB, the stretching modes of the hydroxyl groups involving the hydrogen-bonded dimers and Fermi resonances are evidenced by the 3100, 2670, and 2545 cm<sup>-1</sup> bands (marked by asterisks). The absence of the TOB dimer bands together with the appearance of two new broad bands near the 2500 and 1940 cm<sup>-1</sup> (marked by dotted lines), in the spectra of PS-*b*-P4VP(TOB)<sub>x</sub> with different TOB contents, are attributed to the O-H stretching band and its Fermi resonances of well dispersed TOB hydrogen-bonding with P4VP. The shift of the carbonyl band of TOB at 1687 cm<sup>-1</sup> to 1704 cm<sup>-1</sup> (as marked by the broken line) furthermore supports the formation of hydrogen bonding between carboxylic acids of TOB and pyridines of P4VP blocks in PS-*b*-P4VP(TOB)<sub>x</sub>.

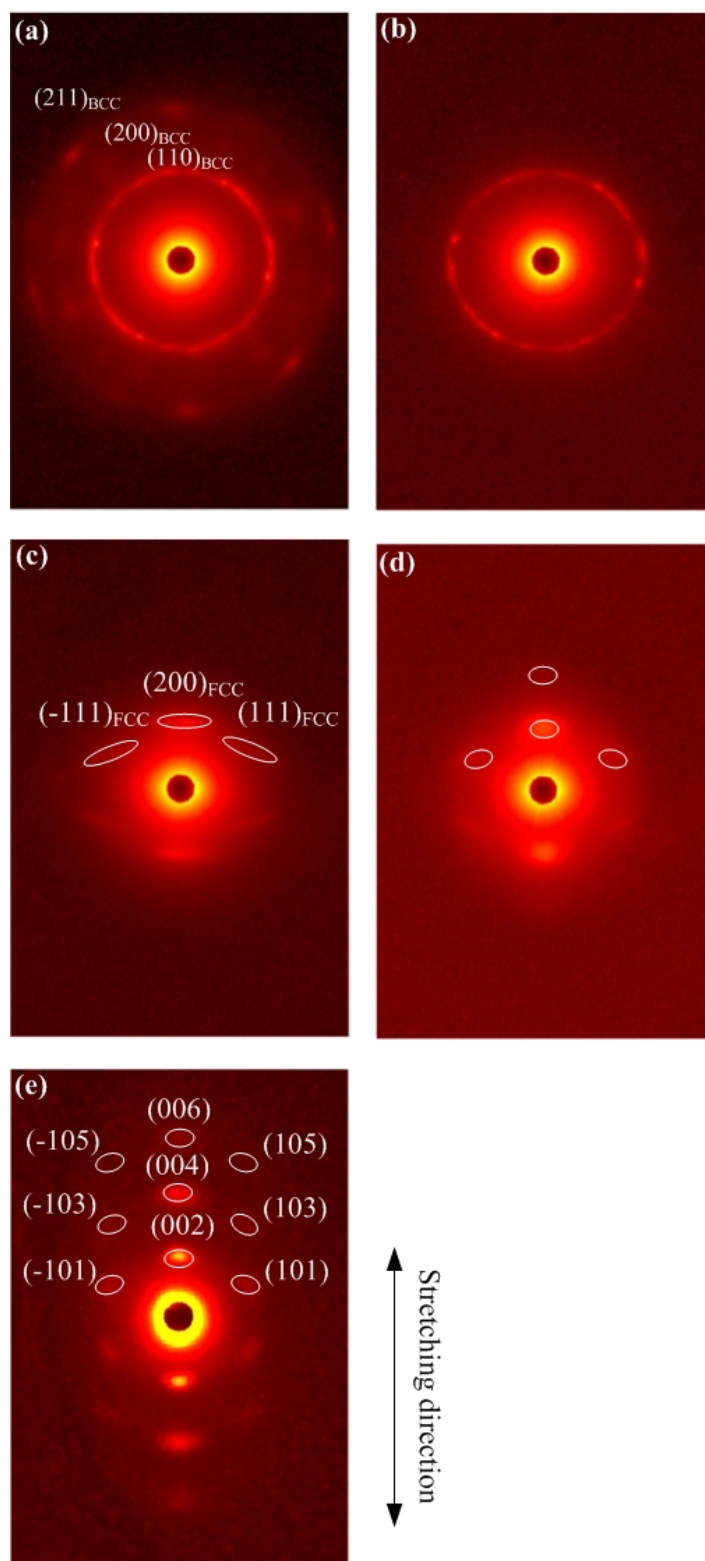

**Figure S3** Detailed evolution of 2D SAXS patterns in situ obtained for the solvent-cast film of PS-*b*-P4VP(TOB)<sub>0.7</sub> subject to subsequent thermal stretching and annealing: at room temperature before stretching (a), at 120 °C under low stretched ratio of ~1.2 (b), at 120 °C under higher stretched ratio of ~2 (c), cooled down to 85 °C following by releasing stress (d), at 85 °C for long annealing time of more than 6 hours (e). The arrow in (e) indicates the stretching direction.

### Details of the columnar LC structure.

In the text, Figure 2f exhibits three sharp arc-like reflections along the equatorial direction with a peak position ratio 1:  $3^{1/2}$ : 2, revealing a corresponding local LC phase transformation (from the oriented smectic layers) to  $\text{HEX}_{\text{col}}$  columns of  $\text{P4VP}(\text{TOB})_{0.7}$ . These columnar domains are highly oriented in the direction perpendicular to the stretching. Moreover, the 2D WAXS pattern (inset of Figure 2f) displays a diffuse halo at  $q = 13 \text{ nm}^{-1}$  ( $d = 0.48 \text{ nm}$ ) with an emphasis on the four-lobe pattern (Figure S4 shown below). This corresponds to oriented TOB molecules, with the fan-like molecular plane (including  $\pi$ - $\pi$  stacking and the three coplanar aliphatic chains) forming a preferred inclined angle  $55^\circ$  with the column axis; spread of the orientation is, however, significant ( $\pm \sim 20^\circ$ ) as shown in Figure S4.

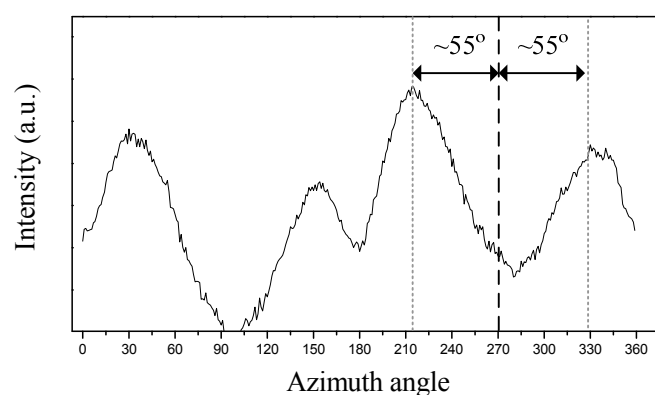

**Figure S4** Azimuthal scan for the intensity profile of the four-lobe reflection pattern observed ( $q = 13 \text{ nm}^{-1}$ ) in the inset of Figure 2f.

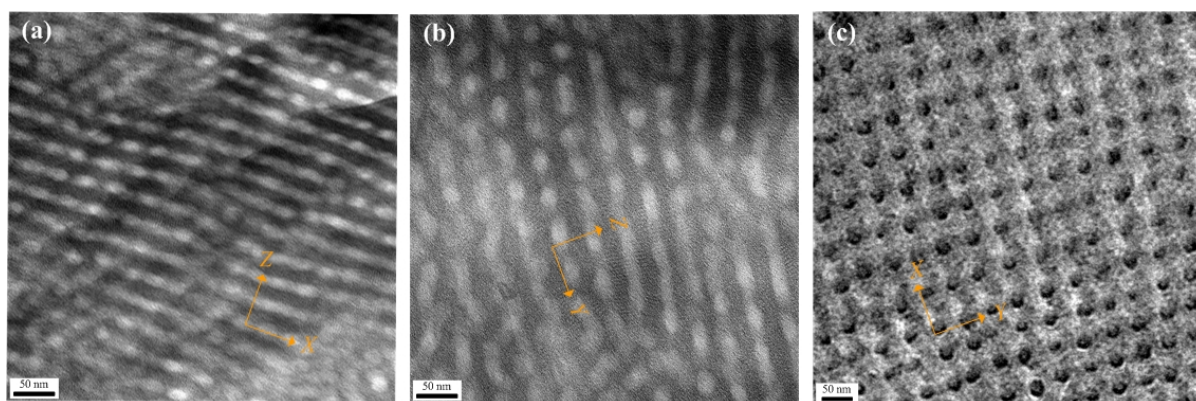

**Figure S5** TEM images of microtomed sections (with iodine-stained P4VP domains in black) cut along the  $XZ$  plane (a),  $YZ$  plane (b) and the  $XY$  plane (c), for constructing the 3D representation in Figure 4 for the  $\text{HEX}_{\text{col}}\text{-within-TPL}$  structure of  $\text{PS-}b\text{-P4VP}(\text{TOB})_{0.7}$ .

### Reference

S1. Kihara, H.; Kato, T.; Uryu, T.; Fréchet, J. M. J. *Chem. Mater.* **1996**, *8*, 961-968.
